# Supplementary material
Source: publisher figshare collection journal article supplement (https://frontiersin.figshare.com/ndownloader/files/13245515)

# Down-regulated Pathways

# Tryptophan metabolism

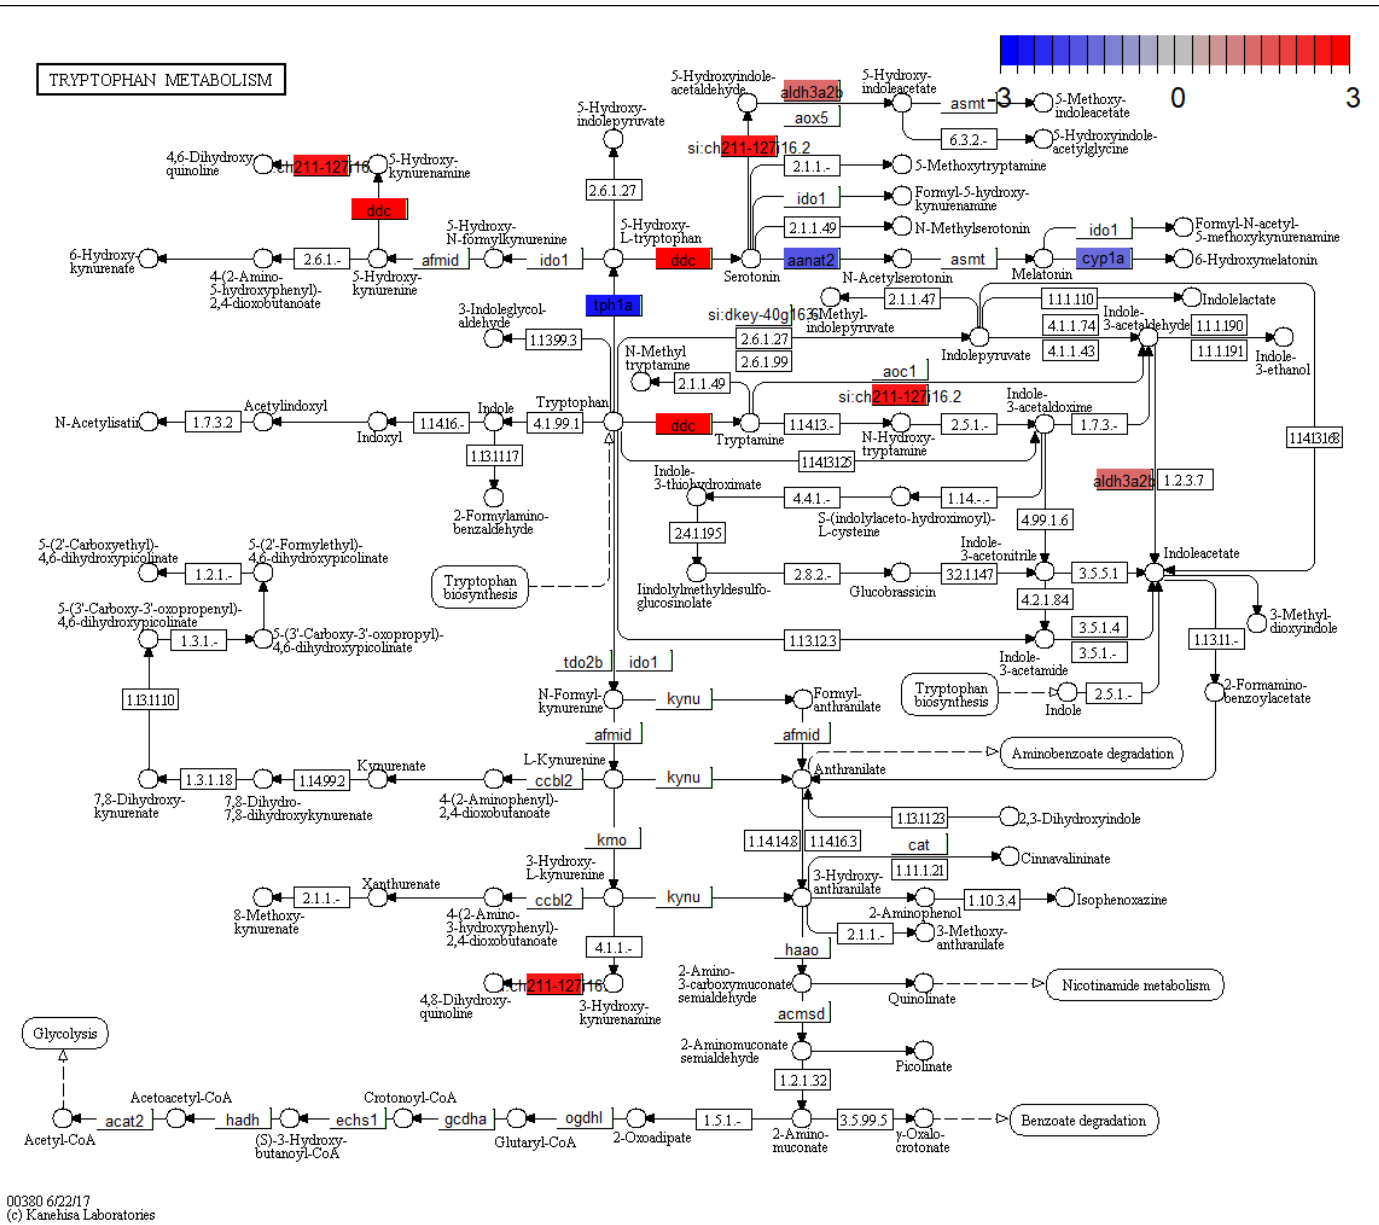

# Tight junction

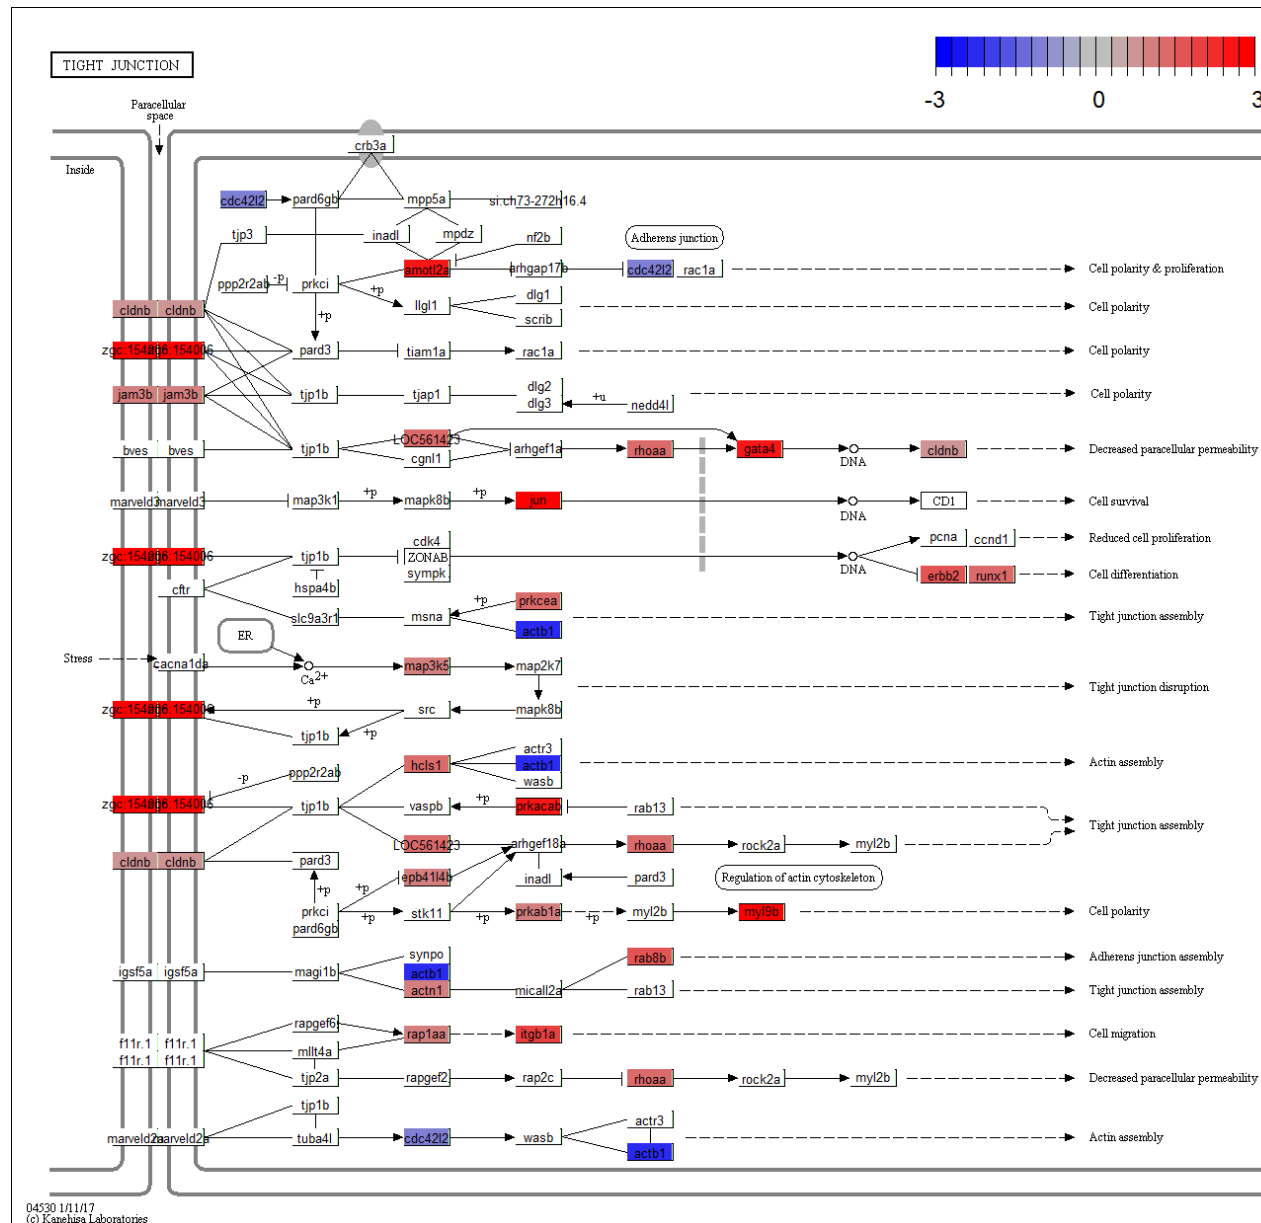

Supplement: Supplementary file [file 13245515]
